# Supplementary material
Source: MDPI journal article supplement (https://www.mdpi.com/2073-4344/7/11/326)
Supplement: s1 [file s1]

# Synthesis of Phase Pure Hexagonal YFeO<sub>3</sub> Perovskite as Efficient Visible Light Active Photocatalyst

Mohammed Ismael<sup>1</sup>, Engy Elhaddad<sup>1,2</sup>, Dereje H. Taffa<sup>1</sup>, Michael Wark<sup>1</sup>

<sup>1</sup> Institute of Chemistry, Chemical Technology 1, Carl von Ossietzky University Oldenburg, Carl-von-Ossietzky-Str. 9-11, 26129 Oldenburg, Germany, E-mail: [michael.wark@uni-oldenburg.de](mailto:michael.wark@uni-oldenburg.de)

<sup>2</sup> National Institute of Oceanography and Fisheries, Alkasr Alaini St. 101, Cairo, Egypt

## Supporting Information (SI):

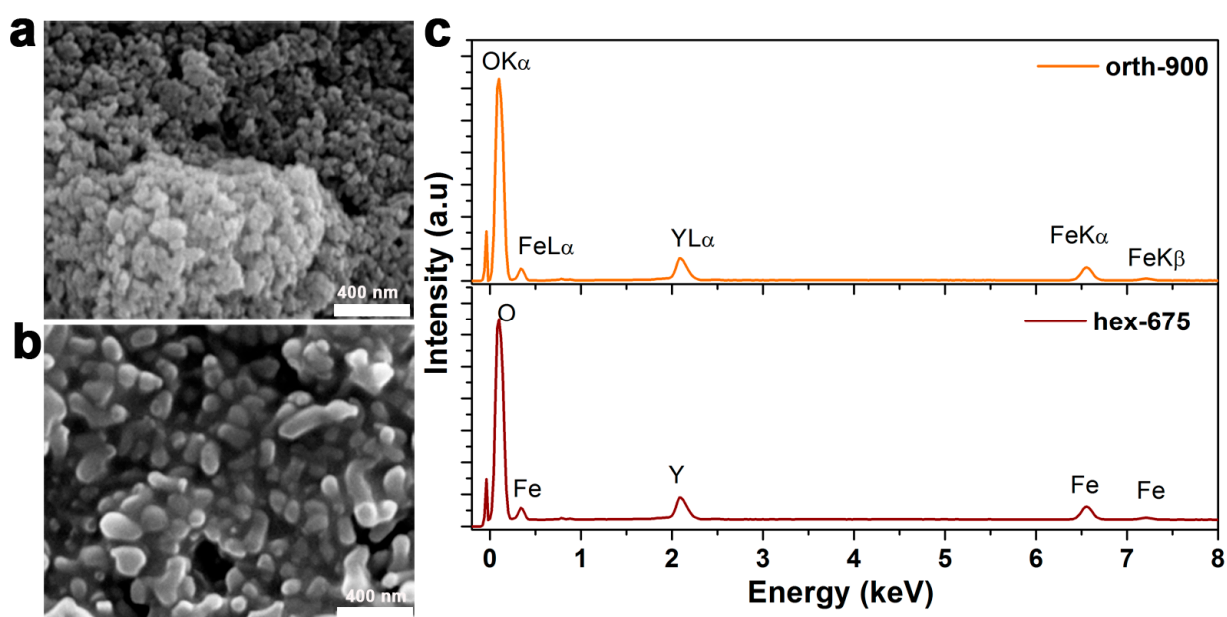

**Figure S1.** SEM micrographs of (a) hex-675 and (b) orth-900. (c) The EDXS analysis showing the elemental composition.

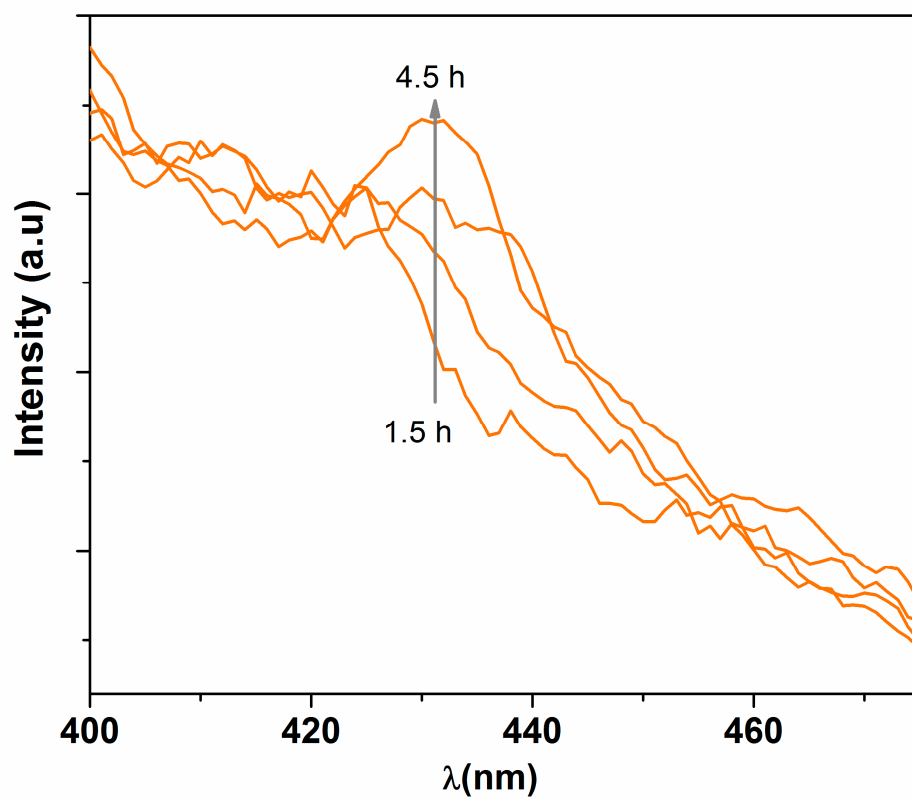

**Figure S2.** Fluorescence spectral changes observed during visible light illumination of hex-675 sample in terephthalic acid (TA) solution (3 mM TA /10 mM NaOH, excitation at 320 nm). The spectra were recorded at intervals of 1.5 h.

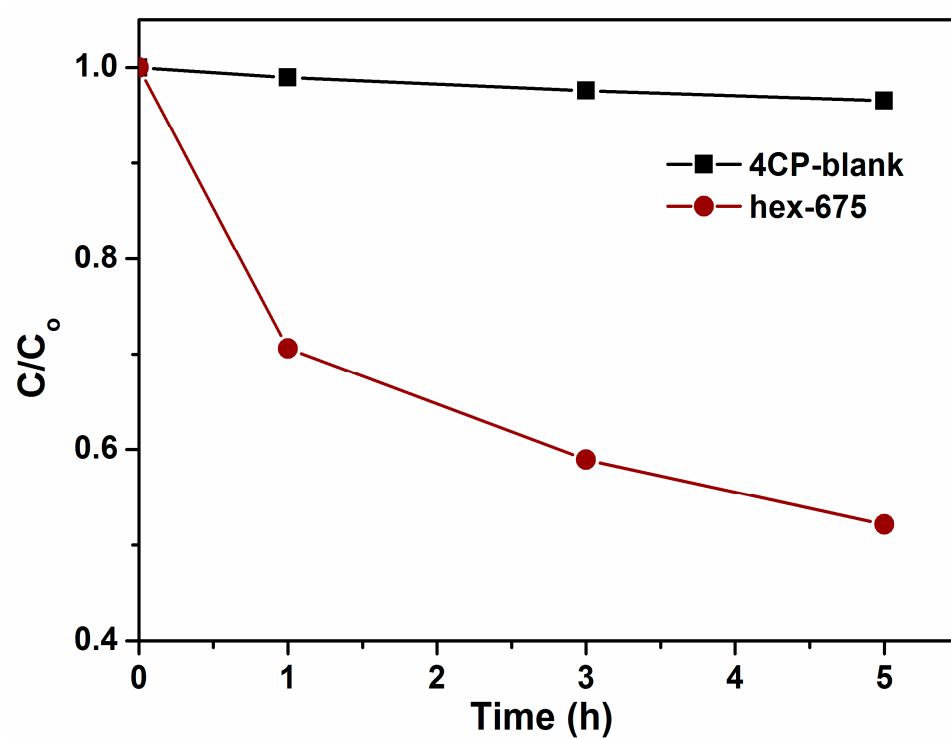

**Figure S3.** Photocatalytic degradation curves for 4-CP ( $1 \times 10^{-3}$  M) using hex-675. Light source: 150 W Xe arc lamp with cut-off filter  $\lambda > 420$  nm.
